## Correction

**Correction: MtDNA depleted PC3 cells exhibit Warburg effect and cancer stem cell features**

**Xiaoran Li<sup>1,2</sup>, Yali Zhong<sup>3</sup>, Jie Lu<sup>4</sup>, Karol Axcrona<sup>6</sup>, Lars Eide<sup>5</sup>, Randi G. Syljuåsen<sup>7</sup>, Qian Peng<sup>1</sup>, Junbai Wang<sup>1</sup>, Hongquan Zhang<sup>8</sup>, Mariusz Adam Goscinski<sup>9</sup>, Gunnar Kvalheim<sup>10</sup>, Jahn M. Nesland<sup>1,2</sup>, Zhenhe Suo<sup>1,2</sup>**

**Present:** Due to incorrect labeling on the part of the authors, it was discovered that a different set of cell lines was used than those initially published. The authors confirmed that all the research data presented in this paper were based on *in vitro* studies with human CRPC DU145 cells, and not with human CRPC PC3 cells. Therefore, the correct title for this paper should be:

“MtDNA depleted DU145 cells exhibit Warburg effect and cancer stem cell features.” In addition, the gene symbols presented in this paper were mistakenly used. The correct style of gene symbols for any PCR and transcriptome analyses of DU145 and mtDNA depleted DU145 cells in this study should be with all characters italic and capitalized.

**Corrected:** The proper designation of cell lines and labels are found below. The authors deeply apologize for any confusion or inconvenience that this mistake may have caused.

Original article: Oncotarget. 2016; 7(26):40297-40313. doi: 10.18632/oncotarget.9610.

The authors regret to inform that DU145 human castration resistant prostate cancer (CRPC) cells were used instead of human CRPC PC3 cells in this paper. The authors pointed out that the mistake was due to the incorrect tube labeling, and such a mistake was discovered by a series of cell line genotyping after the publication of this manuscript. The authors confirmed that all the research data presented in this paper were based on *in vitro* studies with human CRPC DU145 cells, and not with human CRPC PC3 cells. Therefore, the correct title for this paper should be: MtDNA depleted DU145 cells exhibit Warburg effect and cancer stem cell features.

In addition, the gene symbols presented in this paper were mistakenly used, according to the guidelines for human gene nomenclature [1], in specific rule: “Names start with a lower case letter unless it is a person’s name describing a disease/phenotype or a capitalised abbreviation e.g. AHDS “Allan-Herndon-Dudley syndrome” and ABCA1 “ATP-binding cassette, sub-family A (ABC1), member 1”, respectively.”. Therefore the correct style of gene symbols for any PCR and transcriptome analyses of DU145 and mtDNA depleted DU145 cells in this study should be with all characters italic and capitalized.

These errors do not affect any scientific measures and experimental conclusions of this paper. The authors deeply apologize for any confusion or inconvenience that this mistake may have caused. Genotyping data for the control and experimental cells are available upon request.

A complete list of specific corrections are showing as follows.

| #  | Location                      | Origin | Correction | Explanations                 |
|----|-------------------------------|--------|------------|------------------------------|
| 1  | In "Title": Page 1 Line1      | PC3    | DU145      | Correction of cell line used |
| 2  | In "Abstract": Page 1 Line 33 | PC3    | DU145      | Correction of cell line used |
| 3  | In "Abstract": Page 1 Line 36 | PC3    | DU145      | Correction of cell line used |
| 4  | In "Abstract": Page 1 Line 37 | PC3    | DU145      | Correction of cell line used |
| 5  | In "Abstract": Page 1 Line 38 | PC3    | DU145      | Correction of cell line used |
| 6  | Page 2 right column Line 19   | PC3    | DU145      | Correction of cell line used |
| 7  | Page 2 right column Line 22   | PC3    | DU145      | Correction of cell line used |
| 8  | Page 2 right column Line 25   | PC3    | DU145      | Correction of cell line used |
| 9  | Page 2 right column Line 30   | PC3    | DU145      | Correction of cell line used |
| 10 | Page 2 right column Line 35   | PC3    | DU145      | Correction of cell line used |
| 11 | Page 2 right column Line 51   | PC3    | DU145      | Correction of cell line used |
| 12 | Page 3 Line 2                 | PC3    | DU145      | Correction of cell line used |
| 13 | Page 3 Line 2                 | PC3    | DU145      | Correction of cell line used |
| 14 | Page 3 Line 4                 | PC3    | DU145      | Correction of cell line used |
| 15 | Page 3 Line 5                 | PC3    | DU145      | Correction of cell line used |
| 16 | Page 3 Line 6                 | PC3    | DU145      | Correction of cell line used |
| 17 | Page 4 left column Line 8     | PC3    | DU145      | Correction of cell line used |
| 18 | Page 4 left column Line 20    | PC3    | DU145      | Correction of cell line used |
| 19 | Page 4 left column Line 26    | PC3    | DU145      | Correction of cell line used |
| 20 | Page 4 left column Line 30    | PC3    | DU145      | Correction of cell line used |
| 21 | Page 4 left column Line 30    | PC3    | DU145      | Correction of cell line used |
| 22 | Page 4 left column Line 35    | PC3    | DU145      | Correction of cell line used |
| 23 | Page 4 left column Line 39    | PC3    | DU145      | Correction of cell line used |
| 24 | Page 4 left column Line 41    | PC3    | DU145      | Correction of cell line used |
| 25 | Page 4 left column Line 46    | PC3    | DU145      | Correction of cell line used |
| 26 | Page 4 left column Line 51    | PC3    | DU145      | Correction of cell line used |
| 27 | Page 4 right column Line 1    | PC3    | DU145      | Correction of cell line used |
| 28 | Page 4 right column Line 7    | PC3    | DU145      | Correction of cell line used |
| 29 | Page 4 right column Line 8    | PC3    | DU145      | Correction of cell line used |
| 30 | Page 4 right column Line 18   | PC3    | DU145      | Correction of cell line used |
| 31 | Page 4 right column Line 26   | PC3    | DU145      | Correction of cell line used |
| 32 | Page 4 right column Line 30   | PC3    | DU145      | Correction of cell line used |
| 33 | Page 4 right column Line 32   | PC3    | DU145      | Correction of cell line used |

| #  | Location                    | Origin | Correction | Explanations                 |
|----|-----------------------------|--------|------------|------------------------------|
| 34 | Page 4 right column Line 36 | PC3    | DU145      | Correction of cell line used |
| 35 | Page 4 right column Line 38 | PC3    | DU145      | Correction of cell line used |
| 36 | Page 4 right column Line 50 | PC3    | DU145      | Correction of cell line used |
| 37 | Page 4 right column Line 56 | PC3    | DU145      | Correction of cell line used |
| 38 | Page 5 left column Line 2   | PC3    | DU145      | Correction of cell line used |
| 39 | Page 5 left column Line 6   | PC3    | DU145      | Correction of cell line used |
| 40 | Page 5 right column Line 2  | PC3    | DU145      | Correction of cell line used |
| 41 | Page 5 bottom Line 7        | PC3    | DU145      | Correction of cell line used |
| 42 | Page 5 bottom Line 12       | PC3    | DU145      | Correction of cell line used |
| 43 | Page 5 bottom Line 13       | PC3    | DU145      | Correction of cell line used |
| 44 | Page 5 bottom Line 15       | PC3    | DU145      | Correction of cell line used |
| 45 | Page 6 left column Line 3   | PC3    | DU145      | Correction of cell line used |
| 46 | Page 6 left column Line 4   | PC3    | DU145      | Correction of cell line used |
| 47 | Page 6 left column Line 5   | PC3    | DU145      | Correction of cell line used |
| 48 | Page 6 left column Line 5   | PC3    | DU145      | Correction of cell line used |
| 49 | Page 6 left column Line 7   | PC3    | DU145      | Correction of cell line used |
| 50 | Page 6 left column Line 9   | PC3    | DU145      | Correction of cell line used |
| 51 | Page 6 left column Line 12  | PC3    | DU145      | Correction of cell line used |
| 52 | Page 6 left column Line 15  | PC3    | DU145      | Correction of cell line used |
| 53 | Page 6 left column Line 16  | PC3    | DU145      | Correction of cell line used |
| 54 | Page 6 left column Line 18  | PC3    | DU145      | Correction of cell line used |
| 55 | Page 6 right column Line 5  | PC3    | DU145      | Correction of cell line used |
| 56 | Page 6 right column Line 14 | PC3    | DU145      | Correction of cell line used |
| 57 | Page 6 right column Line 14 | PC3    | DU145      | Correction of cell line used |
| 58 | Page 6 right column Line 19 | PC3    | DU145      | Correction of cell line used |
| 59 | Page 6 bottom Line 20       | PC3    | DU145      | Correction of cell line used |
| 60 | Page 6 bottom Line 20       | PC3    | DU145      | Correction of cell line used |
| 61 | Page 6 bottom Line 22       | PC3    | DU145      | Correction of cell line used |
| 62 | Page 6 bottom Line 22       | PC3    | DU145      | Correction of cell line used |
| 63 | Page 6 bottom Line 23       | PC3    | DU145      | Correction of cell line used |
| 64 | Page 7 left column Line 3   | PC3    | DU145      | Correction of cell line used |
| 65 | Page 7 left column Line 6   | PC3    | DU145      | Correction of cell line used |
| 66 | Page 7 right column Line 3  | PC3    | DU145      | Correction of cell line used |

| #  | Location                    | Origin | Correction | Explanations                 |
|----|-----------------------------|--------|------------|------------------------------|
| 67 | Page 7 right column Line 8  | PC3    | DU145      | Correction of cell line used |
| 68 | Page 7 right column Line 10 | PC3    | DU145      | Correction of cell line used |
| 69 | Page 7 right column Line 10 | PC3    | DU145      | Correction of cell line used |
| 70 | Page 7 bottom Line 11       | PC3    | DU145      | Correction of cell line used |
| 71 | Page 7 bottom Line 12       | PC3    | DU145      | Correction of cell line used |
| 72 | Page 7 bottom Line 12       | PC3    | DU145      | Correction of cell line used |
| 73 | Page 7 bottom Line 17       | PC3    | DU145      | Correction of cell line used |
| 74 | Page 8 left column Line 2   | PC3    | DU145      | Correction of cell line used |
| 75 | Page 8 left column Line 2   | PC3    | DU145      | Correction of cell line used |
| 76 | Page 8 left column Line 4   | PC3    | DU145      | Correction of cell line used |
| 77 | Page 8 bottom Line 9        | PC3    | DU145      | Correction of cell line used |
| 78 | Page 8 bottom Line 11       | PC3    | DU145      | Correction of cell line used |
| 79 | Page 9 left column Line 8   | PC3    | DU145      | Correction of cell line used |
| 80 | Page 9 left column Line 10  | PC3    | DU145      | Correction of cell line used |
| 81 | Page 9 left column Line 12  | PC3    | DU145      | Correction of cell line used |
| 82 | Page 9 left column Line 17  | PC3    | DU145      | Correction of cell line used |
| 83 | Page 9 left column Line 20  | PC3    | DU145      | Correction of cell line used |
| 84 | Page 9 left column Line 24  | PC3    | DU145      | Correction of cell line used |
| 85 | Page 9 left column Line 34  | PC3    | DU145      | Correction of cell line used |
| 86 | Page 9 left column Line 36  | PC3    | DU145      | Correction of cell line used |
| 87 | Page 9 left column Line 37  | PC3    | DU145      | Correction of cell line used |
| 88 | Page 9 left column Line 45  | PC3    | DU145      | Correction of cell line used |
| 89 | Page 9 left column Line 48  | PC3    | DU145      | Correction of cell line used |
| 90 | Page 9 left column Line 53  | PC3    | DU145      | Correction of cell line used |
| 91 | Page 9 left column Line 55  | PC3    | DU145      | Correction of cell line used |
| 92 | Page 9 right column Line 1  | PC3    | DU145      | Correction of cell line used |
| 93 | Page 9 right column Line 8  | PC3    | DU145      | Correction of cell line used |
| 94 | Page 9 right column Line 9  | PC3    | DU145      | Correction of cell line used |
| 95 | Page 9 right column Line 16 | PC3    | DU145      | Correction of cell line used |
| 96 | Page 9 right column Line 17 | PC3    | DU145      | Correction of cell line used |
| 97 | Page 9 right column Line 18 | PC3    | DU145      | Correction of cell line used |
| 98 | Page 9 right column Line 19 | PC3    | DU145      | Correction of cell line used |
| 99 | Page 9 right column Line 41 | PC3    | DU145      | Correction of cell line used |

| #   | Location                     | Origin | Correction | Explanations                 |
|-----|------------------------------|--------|------------|------------------------------|
| 100 | Page 9 right column Line 53  | PC3    | DU145      | Correction of cell line used |
| 101 | Page 10 bottom Line 1        | PC3    | DU145      | Correction of cell line used |
| 102 | Page 10 bottom Line 1        | PC3    | DU145      | Correction of cell line used |
| 103 | Page 10 bottom Line 6        | PC3    | DU145      | Correction of cell line used |
| 104 | Page 11 left column Line 11  | PC3    | DU145      | Correction of cell line used |
| 105 | Page 11 right column Line 6  | PC3    | DU145      | Correction of cell line used |
| 106 | Page 11 left column Line 11  | PC3    | DU145      | Correction of cell line used |
| 107 | Page 11 bottom Line 12       | PC3    | DU145      | Correction of cell line used |
| 108 | Page 11 bottom Line 14       | PC3    | DU145      | Correction of cell line used |
| 109 | Page 11 bottom Line 20       | PC3    | DU145      | Correction of cell line used |
| 110 | Page 12 left column Line 2   | PC3    | DU145      | Correction of cell line used |
| 111 | Page 12 left column Line 17  | PC3    | DU145      | Correction of cell line used |
| 112 | Page 12 left column Line 46  | PC3    | DU145      | Correction of cell line used |
| 113 | Page 120 left column Line 47 | PC3    | DU145      | Correction of cell line used |
| 114 | Page 20 left column Line 52  | PC3    | DU145      | Correction of cell line used |
| 115 | Page 12 left column Line 53  | PC3    | DU145      | Correction of cell line used |
| 116 | Page 12 right column Line 27 | PC3    | DU145      | Correction of cell line used |
| 117 | Page 12 right column Line 36 | PC3    | DU145      | Correction of cell line used |
| 118 | Page 12 right column Line 38 | PC3    | DU145      | Correction of cell line used |
| 119 | Page 12 right column Line 39 | PC3    | DU145      | Correction of cell line used |
| 120 | Page 12 right column Line 44 | PC3    | DU145      | Correction of cell line used |
| 121 | Page 12 right column Line 45 | PC3    | DU145      | Correction of cell line used |
| 122 | Page 12 right column Line 52 | PC3    | DU145      | Correction of cell line used |
| 123 | Page 12 right column Line 54 | PC3    | DU145      | Correction of cell line used |
| 124 | Page 13 left column Line 2   | PC3    | DU145      | Correction of cell line used |
| 125 | Page 13 left column Line 4   | PC3    | DU145      | Correction of cell line used |
| 126 | Page 13 left column Line 8   | PC3    | DU145      | Correction of cell line used |
| 127 | Page 13 left column Line 11  | PC3    | DU145      | Correction of cell line used |
| 128 | Page 13 left column Line 14  | PC3    | DU145      | Correction of cell line used |
| 129 | Page 13 left column Line 36  | PC3    | DU145      | Correction of cell line used |
| 130 | Page 13 left column Line 40  | PC3    | DU145      | Correction of cell line used |
| 131 | Page 13 left column Line 46  | PC3    | DU145      | Correction of cell line used |
| 132 | Page 13 right column Line 8  | PC3    | DU145      | Correction of cell line used |

| #   | Location                     | Origin              | Correction            | Explanations                 |
|-----|------------------------------|---------------------|-----------------------|------------------------------|
| 133 | Page 13 right column Line 8  | PC3                 | DU145                 | Correction of cell line used |
| 134 | Page 13 right column Line 12 | PC3                 | DU145                 | Correction of cell line used |
| 135 | Page 13 right column Line 13 | PC3                 | DU145                 | Correction of cell line used |
| 136 | Page 13 right column Line 44 | PC3                 | DU145                 | Correction of cell line used |
| 137 | In “Figure 2B”               | PC3 <sup>WT</sup>   | DU145 <sup>WT</sup>   | Correction of cell line used |
| 138 | In “Figure 2B”               | PC3 <sup>MtDP</sup> | DU145 <sup>MtDP</sup> | Correction of cell line used |
| 139 | In “Figure 3B”               | PC3 <sup>WT</sup>   | DU145 <sup>WT</sup>   | Correction of cell line used |
| 140 | In “Figure 3B”               | PC3 <sup>MtDP</sup> | DU145 <sup>MtDP</sup> | Correction of cell line used |
| 141 | In “Figure 4D”               | PC3 <sup>WT</sup>   | DU145 <sup>WT</sup>   | Correction of cell line used |
| 142 | In “Figure 4D”               | PC3 <sup>MtDP</sup> | DU145 <sup>MtDP</sup> | Correction of cell line used |
| 143 | In “Figure 5C”               | PC3                 | DU145                 | Correction of cell line used |
| 144 | In “Figure 5C”               | PC3                 | DU145                 | Correction of cell line used |
| 145 | In “Figure 7D”               | PC3 <sup>WT</sup>   | DU145 <sup>WT</sup>   | Correction of cell line used |
| 146 | In “Figure 7D”               | PC3 <sup>MtDP</sup> | DU145 <sup>MtDP</sup> | Correction of cell line used |

#### For Supplementary Material

|     |                               |                     |                       |                              |
|-----|-------------------------------|---------------------|-----------------------|------------------------------|
| 147 | Page 1 left column Line 34    | PC3                 | DU145                 | Correction of cell line used |
| 148 | Page 1 left column Line 34    | PC3                 | DU145                 | Correction of cell line used |
| 149 | Page 3 bottom Line 1          | PC3                 | DU145                 | Correction of cell line used |
| 150 | Page 4 left column Line 1     | PC3                 | DU145                 | Correction of cell line used |
| 151 | In “Supplementary Figure S1A” | PC3                 | DU145                 | Correction of cell line used |
| 152 | In “Supplementary Figure S1B” | PC3                 | DU145                 | Correction of cell line used |
| 153 | In “Supplementary Figure S1C” | PC3                 | DU145                 | Correction of cell line used |
| 154 | In “Supplementary Figure S2”  | PC3 <sup>WT</sup>   | DU145 <sup>WT</sup>   | Correction of cell line used |
| 155 | In “Supplementary Figure S2”  | PC3 <sup>MtDP</sup> | DU145 <sup>MtDP</sup> | Correction of cell line used |

#### References

1. Wojcik F. [Guidelines for human gene nomenclature]. *Annales de biologie clinique*. 2002; 60(3):347-350.
